# Supplementary material for: The Mediating Role of Contextual Problems and Sensation Seeking in the Association between Substance Use and Mental Health in Adolescents from Northern Chile
Source: MDPI journal article supplement (doi:10.3390/ijerph19042262), 2022-02-17
Supplement: s1 [file s1]

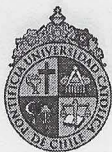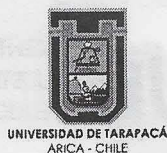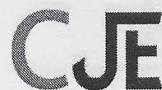

CENTRO  
JUSTICIA  
EDUCACIONAL

### SET1- Preguntas demográficas

|                                                        |
|--------------------------------------------------------|
| <b>Rut o documento de<br/>identidad del estudiante</b> |
|                                                        |

|              |  |
|--------------|--|
| <b>Fecha</b> |  |
|              |  |

|             |
|-------------|
| <b>Edad</b> |
|             |

|               |  |
|---------------|--|
| <b>Sexo</b>   |  |
| <b>Mujer</b>  |  |
| <b>Hombre</b> |  |

**INSTRUCCIONES: MARCA CON UNA "X" LAS OPCIONES QUE CORRESPONDA.**

*Por favor, responde sinceramente. Tus respuestas contribuirán a servir de base para presentar propuestas de mejora al gobierno de Chile.*

#### 1. ¿En qué país naciste?

|  |                    |
|--|--------------------|
|  | Chile              |
|  | Perú               |
|  | Colombia           |
|  | Venezuela          |
|  | Bolivia            |
|  | Ecuador            |
|  | Argentina          |
|  | Haití              |
|  | Otro (especificar) |

#### 2. ¿En qué país nacieron tus padres? (Favor contestar ambos)

| Mamá | Papá |       |
|------|------|-------|
|      |      | Chile |
|      |      | Perú  |
|      |      |       |
